# Supplementary material for: Effects of probiotic supplementation on the regulation of blood lipid levels in overweight or obese subjects: a meta-analysis
Source: Royal Society of Chemistry journal article supplement (doi:10.1039/c8fo02163e), 2019-01-01
Supplement: c8fo02163e1.pdf [file c8fo02163e1.pdf]

**Higashikawa et al. 2015**

|               |                                                                                                                                                                                                                                                                                                                                                                                            |
|---------------|--------------------------------------------------------------------------------------------------------------------------------------------------------------------------------------------------------------------------------------------------------------------------------------------------------------------------------------------------------------------------------------------|
| Methods       | RCT, (living LP28, heat-killed LP28 or a placebo powder),<br>12 weeks<br>Summary risk of bias: low                                                                                                                                                                                                                                                                                         |
| Participants  | Healthy volunteers between 20 and 70 years of age, with a BMI between 25 and 30 kg/m <sup>2</sup><br>N: 21 intervention, 20 control<br>Mean age in years (SD): 52.50 (11.80) intervention, 52.80 (11.60) control<br>Gender: 8 males/13females intervention, 7 males /13 females control<br>Mean BMI (SD): 26.84 (0.25) intervention, 27.37 (0.32) control<br>Location: Japan               |
| Interventions | Type: supplement (powders)<br>Comparison: probiotic supplementation vs. control<br>Intervention: a 10 ml spoon for the living LP28 group daily for 12 weeks, the cell numbers in the 10 ml spoon was 10 <sup>11</sup> .<br>Control: placebo powder with the same dose.<br>Compliance: provided the measuring spoon to volunteers for the intake of LAB<br>Length of intervention: 12 weeks |
| Outcomes      | Main study outcome: changes in body fat, BMI, abdominal circumference, TC, LDL, HDL, TG levels and so on.<br>Dropouts: 2 intervention<br>Available outcomes: changes(the difference between the final value and the baseline) of TC, LDL, HDL and TG levels.                                                                                                                               |
| Notes         | The study has three intervention arms (living LP28, heat-killed LP28 and a placebo powder). We only used the living LP28 as the intervention.                                                                                                                                                                                                                                              |

***Risk of bias***

| Bias                                           | Authors' judgment | Support for judgment                                                                                                                                                                                |
|------------------------------------------------|-------------------|-----------------------------------------------------------------------------------------------------------------------------------------------------------------------------------------------------|
| Random sequence generation<br>(selection bias) | Low risk          | The trial was designed as a double-blind, randomized, placebo-controlled parallel-group study.                                                                                                      |
| Allocation concealment<br>(selection bias)     | Low risk          | The allocation sequence was generated by using a Microsoft Excel randomization function. Randomization assignments were carried out by nonclinical staff who had no other involvement in the trial. |
| Blinding of participants and                   | Low risk          | The subjects were blinded to                                                                                                                                                                        |

|                                                 |              |                                                                                                  |
|-------------------------------------------------|--------------|--------------------------------------------------------------------------------------------------|
| personnel (performance bias)                    |              | treatment allocation.                                                                            |
| All outcomes                                    |              |                                                                                                  |
| Blinding of outcome assessment (detection bias) | Low risk     | The outcome assessors were blinded to treatment allocation.                                      |
| All outcomes                                    |              |                                                                                                  |
| Incomplete outcome data (attrition bias)        | Low risk     | Participant flow well described.                                                                 |
| All outcomes                                    |              |                                                                                                  |
| Selective reporting (reporting bias)            | Unclear risk | Although the design accorded to RCT specifications, the clinical registration number was lacked. |
| Attention                                       | Low risk     | No problem with attention bias.                                                                  |
| Compliance                                      | Low risk     | Provided the measuring spoon to volunteers daily for 12 weeks.                                   |
| Other bias                                      | Low risk     | No commercial company involved, and no conflict of interest.                                     |

**Rajkumar et al. 2014**

|               |                                                                                                                                                                                                                                                                                                                                                                                                                                                                                                                                                                                                                                                                          |
|---------------|--------------------------------------------------------------------------------------------------------------------------------------------------------------------------------------------------------------------------------------------------------------------------------------------------------------------------------------------------------------------------------------------------------------------------------------------------------------------------------------------------------------------------------------------------------------------------------------------------------------------------------------------------------------------------|
| Methods       | RCT, (placebo, omega-3 fatty acid, probiotic VSL#3, both omega-3 and probiotic)<br>6 weeks<br>Summary risk of bias: low                                                                                                                                                                                                                                                                                                                                                                                                                                                                                                                                                  |
| Participants  | healthy adult volunteers of both sexes, aged between 40 and 60 years and with BMI > 25.<br>N: 15 intervention, 15 control<br>Mean age in years (range): 49 years (40–60)<br>Gender: 30 females and 30 males.<br>Location: India                                                                                                                                                                                                                                                                                                                                                                                                                                          |
| Interventions | Type: supplement (capsules)<br>Comparison: probiotic supplementation vs. control<br>Intervention: VSL#3 (manufactured in India by Sun Pharmaceutical Ind. Ltd.) is a freeze-dried pharmaceutical probiotic preparation containing $112.5 \times 10^9$ CFU/capsule of three strains. Subjects were instructed to take one capsule every day before any meal.<br>Control: Identical-looking placebo capsules containing 40 mg microcrystalline cellulose were used for blinding. Subjects were instructed to take one capsule every day before any meal.<br>Compliance: The time for each group to take capsules is strictly regulated.<br>Length of intervention: 6 weeks |
| Outcomes      | Main study outcome: Inflammatory Markers, Lipid Profile, Insulin Resistance, Atherogenic Index and Stool Microbiota.<br>Dropouts: no<br>Available outcomes: the final value and the baseline of TC, LDL, HDL and TG levels.                                                                                                                                                                                                                                                                                                                                                                                                                                              |
| Notes         | The study has four intervention arms (placebo, omega-3 fatty acid, probiotic VSL#3, both omega-3 and probiotic). We only used the probiotic VSL#3 as the intervention.                                                                                                                                                                                                                                                                                                                                                                                                                                                                                                   |

***Risk of bias***

| <b>Bias</b>                                               | <b>Authors' judgment</b> | <b>Support for judgment</b>                                                                                                                          |
|-----------------------------------------------------------|--------------------------|------------------------------------------------------------------------------------------------------------------------------------------------------|
| Random sequence generation<br>(selection bias)            | Low risk                 | The study was a randomized, placebo-controlled trial.                                                                                                |
| Allocation concealment<br>(selection bias)                | Low risk                 | Subjects were given an identification number and were assigned a treatment code by a scientist blind to the treatments corresponding with the codes. |
| Blinding of participants and personnel (performance bias) | Low risk                 | The probiotic, placebo groups and the medical doctor could be                                                                                        |

|                                                                 |          |                                                                                                                                                           |
|-----------------------------------------------------------------|----------|-----------------------------------------------------------------------------------------------------------------------------------------------------------|
| All outcomes                                                    |          | blinded.                                                                                                                                                  |
| Blinding of outcome assessment (detection bias)<br>All outcomes | Low risk | all the investigators, including the collecting anthropometric measurement, the laboratory technician, and the statistician, were blind to the treatment. |
| Incomplete outcome data (attrition bias)<br>All outcomes        | Low risk | There were no dropout.                                                                                                                                    |
| Selective reporting (reporting bias)                            | Low risk | The trial was registered under Clinical Trials Registry India (CTRI/2012/08/002856) (ICMR)                                                                |
| Attention                                                       | Low risk | All participants appear to have had similar frequency and quantity of attention and follow-up.                                                            |
| Compliance                                                      | Low risk | The time for each group to take capsules is strictly regulated.                                                                                           |
| Other bias                                                      | Low risk | No commercial company involved, and no conflict of interest.                                                                                              |

**Jung et al. 2013**

|               |                                                                                                                                                                                                                                                                                                                                                                                                                                                                   |
|---------------|-------------------------------------------------------------------------------------------------------------------------------------------------------------------------------------------------------------------------------------------------------------------------------------------------------------------------------------------------------------------------------------------------------------------------------------------------------------------|
| Methods       | RCT, (BNR17 vs. placebo)<br>12 weeks<br>Summary risk of bias: moderate                                                                                                                                                                                                                                                                                                                                                                                            |
| Participants  | obese volunteers aged 19 to 60 with body mass index $\geq 23$ kg/m <sup>2</sup><br>N: 28 intervention, 29 control<br>Gender: 13 males /15 females intervention, 9 males /20 females control<br>Mean BMI (SD): 28.60 (2.20) intervention, 29.60 (3.60) control<br>Location: Korea                                                                                                                                                                                  |
| Interventions | Type: supplement (capsules)<br>Comparison: probiotic supplementation vs. control<br>Intervention: Subjects were instructed to take 6 capsules per day which composed of 10 <sup>10</sup> cfu of <i>Lb. gasseri</i> BNR17 for 12 weeks.<br>Control: placebo capsules were packaged only with the filler produced by the pharmaceutical factory.<br>Compliance: The time for each group to take capsules is strictly regulated.<br>Length of intervention: 12 weeks |
| Outcomes      | Main study outcome: changes in body weight, waist and hip circumferences, blood pressure, hematology and blood chemistry.<br>Dropouts: 3 intervention, 2 control<br>Available outcomes: changes(the difference between the final value and the baseline) of TC, LDL, HDL and TG levels.                                                                                                                                                                           |
| Notes         | This work was supported by a grant from the Solomon Contract Research Organization and funded by Bioneer Cooperation.                                                                                                                                                                                                                                                                                                                                             |

**Risk of bias**

| Bias                                                                      | Authors' judgment | Support for judgment                                                                    |
|---------------------------------------------------------------------------|-------------------|-----------------------------------------------------------------------------------------|
| Random sequence generation<br>(selection bias)                            | Low risk          | This study was a randomized and placebo-controlled clinical trial.                      |
| Allocation concealment<br>(selection bias)                                | Unclear risk      | Not described                                                                           |
| Blinding of participants and personnel (performance bias)<br>All outcomes | Low risk          | This study was a double-blinded clinical trial.                                         |
| Blinding of outcome assessment (detection bias)<br>All outcomes           | Unclear risk      | The data were analyzed using ITT and PP analysis, but unclear if blinded to allocation. |
| Incomplete outcome data<br>(attrition bias)<br>All outcomes               | Low risk          | Participant flow well described.<br>The intention-to-treat (ITT) analysis was used.     |
| Selective reporting (reporting bias)                                      | Unclear risk      | Although the design accorded to RCT specifications, the clinical                        |

|            |          |                                                                                                |
|------------|----------|------------------------------------------------------------------------------------------------|
|            |          | registration number was lacked.                                                                |
| Attention  | Low risk | All participants appear to have had similar frequency and quantity of attention and follow-up. |
| Compliance | Low risk | The time for each group to take capsules is strictly regulated.                                |
| Other bias | Low risk | No commercial company involved, and no conflict of interest.                                   |

**Stenman et al. 2016**

|               |                                                                                                                                                                                                                                                                                                                                                                                                                                                                                                                                                                                                                                           |
|---------------|-------------------------------------------------------------------------------------------------------------------------------------------------------------------------------------------------------------------------------------------------------------------------------------------------------------------------------------------------------------------------------------------------------------------------------------------------------------------------------------------------------------------------------------------------------------------------------------------------------------------------------------------|
| Methods       | RCT, (dietary fiber, <i>Bifidobacterium animalis ssp. lactis</i> 420 (B420), fiber+B420 and placebo)<br>6 months<br>Summary risk of bias: low                                                                                                                                                                                                                                                                                                                                                                                                                                                                                             |
| Participants  | Eligible participants were 18–65 years old with a BMI between 28.0-34.9 and a waist to hip ratio of $\geq 0.88$ for males and $\geq 0.83$ for females.<br>N: 48 intervention, 56 control<br>Mean age in years (SD): 50.60 (10.60) intervention, 49.90 (8.50) control<br>Gender: 9 males /39 females intervention, 12 males /44 females control<br>Mean BMI (SD): 31.50 (2.20) intervention, 31.20 (2.20) control<br>Location: Finland                                                                                                                                                                                                     |
| Interventions | Type: supplement (sachet)<br>Comparison: probiotic supplementation vs. control<br>Intervention: $10^{10}$ CFU/day in 12g of microcrystalline cellulose (B420)<br>Control: microcrystalline cellulose 12 g/day<br>Compliance: Participants were asked to report product intake on a specific check-list. Participants were asked to return all used and unused sachets to the site to count the number of opened sachets per the number of treatment days, and Fecal samples were analyzed for the presence of B420 with qPCR from all participant who returned a fecal sample at the six-month visit.<br>Length of intervention: 6 months |
| Outcomes      | Main study outcome: changes in body fat mass, anthropometric measurements, food intake and blood and fecal biomarkers.<br>Dropouts: 7 intervention, 1 control<br>Available outcomes: changes(the difference between the final value and the baseline) of TC, LDL, HDL and TG levels.                                                                                                                                                                                                                                                                                                                                                      |
| Notes         | The study has four intervention arms (dietary fiber, B420, fiber+B420 and placebo). We only used the B420 as the intervention.                                                                                                                                                                                                                                                                                                                                                                                                                                                                                                            |

**Risk of bias**

| Bias                                           | Authors' judgment | Support for judgment                                                                                                                     |
|------------------------------------------------|-------------------|------------------------------------------------------------------------------------------------------------------------------------------|
| Random sequence generation<br>(selection bias) | Low risk          | Randomized Controlled Trial                                                                                                              |
| Allocation concealment<br>(selection bias)     | Low risk          | The randomization scheme (1:1:1:1 allocation) was generated using a computerized procedure into blocks of four randomization codes each. |

|                                                                           |              |                                                                                                                                                                                                                                                                                                                                                                          |
|---------------------------------------------------------------------------|--------------|--------------------------------------------------------------------------------------------------------------------------------------------------------------------------------------------------------------------------------------------------------------------------------------------------------------------------------------------------------------------------|
| Blinding of participants and personnel (performance bias)<br>All outcomes | Low risk     | The participants and the site personnel were all blinded to the randomization until the end of the intervention phase, when all data for primary and secondary outcomes, adverse events and compliance had been collected and validated.                                                                                                                                 |
| Blinding of outcome assessment (detection bias)<br>All outcomes           | Low risk     | The study monitor, the statistician and sponsor's representatives were all blinded to the randomization until the end of the intervention phase, when all data for primary and secondary outcomes, adverse events and compliance had been collected and validated.                                                                                                       |
| Incomplete outcome data (attrition bias)<br>All outcomes                  | Low risk     | Participant flow well described. The intention-to-treat (ITT) analysis was used.                                                                                                                                                                                                                                                                                         |
| Selective reporting (reporting bias)                                      | Low risk     | The study was registered in Clinicaltrials.gov(NCT01978691).                                                                                                                                                                                                                                                                                                             |
| Attention                                                                 | Low risk     | Participants, investigators, study monitor, the statistician and all other study personnel are masked to treatment assignment, so attention bias not feasible.                                                                                                                                                                                                           |
| Compliance                                                                | Low risk     | Participants were asked to report product intake on a specific check-list. Participants were asked to return all used and unused sachets to the site to count the number of opened sachets per the number of treatment days, and Fecal samples were analyzed for the presence of B420 with qPCR from all participant who returned a fecal sample at the six-month visit. |
| Other bias                                                                | Unclear risk | The commercial company was involved.                                                                                                                                                                                                                                                                                                                                     |



**Safavi et al. 2013**

|               |                                                                                                                                                                                                                                                                                                                                                                                                                                                                                                                                      |
|---------------|--------------------------------------------------------------------------------------------------------------------------------------------------------------------------------------------------------------------------------------------------------------------------------------------------------------------------------------------------------------------------------------------------------------------------------------------------------------------------------------------------------------------------------------|
| Methods       | RCT, (synbiotic vs. placebo)<br>8 weeks<br>Summary risk of bias: low                                                                                                                                                                                                                                                                                                                                                                                                                                                                 |
| Participants  | This trial comprised 70 healthy-looking children and adolescents, aged 6–18 years, with a BMI equal to or higher than the age- and sex-specific 85th percentile<br>N: 29 intervention, 27 control<br>Mean age in years (SD): 10.75 (2.49) intervention, 10.09 (1.93) control<br>Mean BMI in Z score(SD): 1.79 (0.50) intervention, 1.67 (0.39) control<br>Location: Iran                                                                                                                                                             |
| Interventions | Type: supplement (capsules)<br>Comparison: synbiotic supplementation vs. control<br>Intervention: Each individual was instructed to take one capsule once a day contained $2.0 \times 10^8$ CFU before a main meal for 8 weeks.<br>Control: Capsules contained maltodextrine and consisted of it with shape, taste and smell identical to synbiotic.<br>Compliance: The medication compliance was tracked by weekly phone call to participants and regular stool examination for bacterial count.<br>Length of intervention: 8 weeks |
| Outcomes      | Main study outcome: anthropometric indexes and cardio-metabolic risk factors in obese children and adolescents.<br>Dropouts: 14<br>Available outcomes: the final value and the baseline of TC, LDL, HDL and TG levels.                                                                                                                                                                                                                                                                                                               |
| Notes         | This study was supported by a grant from the Isfahan University of Medical Sciences, Isfahan, Iran.                                                                                                                                                                                                                                                                                                                                                                                                                                  |

***Risk of bias***

| Bias                                                                      | Authors' judgment | Support for judgment                                                |
|---------------------------------------------------------------------------|-------------------|---------------------------------------------------------------------|
| Random sequence generation<br>(selection bias)                            | Low risk          | Randomized Controlled Trial                                         |
| Allocation concealment<br>(selection bias)                                | Unclear risk      | Not described                                                       |
| Blinding of participants and personnel (performance bias)<br>All outcomes | Low risk          | Double-blinded                                                      |
| Blinding of outcome assessment (detection bias)<br>All outcomes           | Low risk          | Participants and other staff involved blinded throughout the study. |

|                                                             |          |                                                                                                                                        |
|-------------------------------------------------------------|----------|----------------------------------------------------------------------------------------------------------------------------------------|
| Incomplete outcome data<br>(attrition bias)<br>All outcomes | Low risk | No problem with attrition bias                                                                                                         |
| Selective reporting (reporting<br>bias)                     | Low risk | Trial registry code:<br>IRCT201103081434N4.                                                                                            |
| Attention                                                   | Low risk | All anthropometric measurements<br>were made by the same trained<br>person and under the supervision<br>of the same pediatrician.      |
| Compliance                                                  | Low risk | The medication compliance was<br>tracked by weekly phone call to<br>participants and regular stool<br>examination for bacterial count. |
| Other bias                                                  | Low risk | No commercial company<br>involved, and no conflict of<br>interest.                                                                     |

**Ipar et al. 2015**

|               |                                                                                                                                                                                                                                                                                                                                                         |
|---------------|---------------------------------------------------------------------------------------------------------------------------------------------------------------------------------------------------------------------------------------------------------------------------------------------------------------------------------------------------------|
| Methods       | RCT, (synbiotic vs. standard)<br>30 days<br>Summary risk of bias: high                                                                                                                                                                                                                                                                                  |
| Participants  | This study including children and adolescents aged between 4 to 17 years old with a body mass index (BMI) >95th percentile for age and sex.<br>N: 42 intervention, 35 control<br>Mean BMI (SD): 27.20 (4.50) intervention, 26.30 (3.90) control<br>Location: Turkey                                                                                     |
| Interventions | Type: supplement (sachet)<br>Comparison: synbiotic supplementation vs. control<br>Intervention: received a daily synbiotic supplementation which consisted of a probiotic mixture<br>Control: standard method<br>Compliance: Children of both groups were followed for one month, and the daily diet was controlled.<br>Length of intervention: 30 days |
| Outcomes      | Main study outcome: anthropometric measurements, biochemical indices, serum TAC and TOS levels<br>Dropouts: 1 intervention, 8 control<br>Available outcomes: the final value and the baseline of TC, LDL, HDL and TG levels.                                                                                                                            |
| Notes         | The study was funded by the Eskisehir Osmangazi University Research Project.                                                                                                                                                                                                                                                                            |

***Risk of bias***

| <b>Bias</b>                                                               | <b>Authors' judgment</b> | <b>Support for judgment</b>                   |
|---------------------------------------------------------------------------|--------------------------|-----------------------------------------------|
| Random sequence generation<br>(selection bias)                            | Low risk                 | This study was a randomized, controlled study |
| Allocation concealment<br>(selection bias)                                | Unclear risk             | Not described                                 |
| Blinding of participants and personnel (performance bias)<br>All outcomes | High risk                | Open label                                    |
| Blinding of outcome assessment (detection bias)<br>All outcomes           | High risk                | Open label                                    |
| Incomplete outcome data<br>(attrition bias)<br>All outcomes               | Low risk                 | Participant flow well described.              |
| Selective reporting (reporting bias)                                      | Low risk                 | Trial registry code: NCT01927107              |

|            |          |                                                                                                                                                                                                                      |
|------------|----------|----------------------------------------------------------------------------------------------------------------------------------------------------------------------------------------------------------------------|
| Attention  | Low risk | Children of both groups were followed for one month, after which all children were re-evaluated by the same physician. All anthropometric measurements, biochemical indices, serum TAC and TOS levels were repeated. |
| Compliance | Low risk | Children of both groups were followed for one month, and the daily diet was controlled.                                                                                                                              |
| Other bias | Low risk | No commercial company involved, and no conflict of interest.                                                                                                                                                         |

**Gobel et al. 2012**

|               |                                                                                                                                                                                                                                                                                                                                                                                   |
|---------------|-----------------------------------------------------------------------------------------------------------------------------------------------------------------------------------------------------------------------------------------------------------------------------------------------------------------------------------------------------------------------------------|
| Methods       | RCT, (Ls-33 vs. placebo)<br>12 weeks<br>Summary risk of bias: low                                                                                                                                                                                                                                                                                                                 |
| Participants  | The study including 50 adolescents which between the age of 12 and 15 years with obesity.<br>N: 27 intervention, 23 control<br>Mean age in years (SD): 12.90 (1.00) intervention, 13.40 (1.10) control<br>Gender: 11 males /16 females intervention, 11 males /12 females control<br>Mean BMI (SD) in Z score: 2.60 (0.50) intervention, 2.60 (0.40) control<br>Location: Denmark |
| Interventions | Type: supplement (capsules)<br>Comparison: probiotic supplementation vs. control<br>Intervention: ingested as 1 capsule containing the daily dosage of $10^{10}$ CFU during a period of 12 weeks.<br>Control: consisted of filler material only<br>Compliance: Not described<br>Length of intervention: 12 weeks                                                                  |
| Outcomes      | Main study outcome: a series of biomarkers related to inflammation and the metabolic syndrome<br>Dropouts: 1 intervention, 4 control<br>Available outcomes: the final value and the baseline of TC, LDL, HDL and TG levels.                                                                                                                                                       |
| Notes         | The study was approved by the scientific ethical committees of the Capital Region of Denmark.                                                                                                                                                                                                                                                                                     |

***Risk of bias***

| <b>Bias</b>                                                               | <b>Authors' judgment</b> | <b>Support for judgment</b>                                                                    |
|---------------------------------------------------------------------------|--------------------------|------------------------------------------------------------------------------------------------|
| Random sequence generation<br>(selection bias)                            | Low risk                 | Randomized, placebo-controlled intervention study                                              |
| Allocation concealment<br>(selection bias)                                | Low risk                 | The random allocation sequence was generated with blocks of 8, and done using a computer model |
| Blinding of participants and personnel (performance bias)<br>All outcomes | Low risk                 | Double-blinded                                                                                 |
| Blinding of outcome assessment (detection bias)<br>All outcomes           | Low risk                 | The grouping of study kept unavailable until data analysis was completed.                      |
| Incomplete outcome data<br>(attrition bias)                               | Low risk                 | Participant flow well described.                                                               |

|                                      |              |                                                              |
|--------------------------------------|--------------|--------------------------------------------------------------|
| All outcomes                         |              |                                                              |
| Selective reporting (reporting bias) | Low risk     | Trial registry code: NCT 01020617                            |
| Attention                            | Unclear risk | Not described                                                |
| Compliance                           | Unclear risk | Not described                                                |
| Other bias                           | Low risk     | No commercial company involved, and no conflict of interest. |

**Szulińska et al. 2018**

|               |                                                                                                                                                                                                                                                                                                                                                                                                                                                                                                                                                                                                                      |
|---------------|----------------------------------------------------------------------------------------------------------------------------------------------------------------------------------------------------------------------------------------------------------------------------------------------------------------------------------------------------------------------------------------------------------------------------------------------------------------------------------------------------------------------------------------------------------------------------------------------------------------------|
| Methods       | RCT, (original probiotic, low probiotic and placebo)<br>12 weeks<br>Summary risk of bias: low                                                                                                                                                                                                                                                                                                                                                                                                                                                                                                                        |
| Participants  | A total of 110 obese postmenopausal women were initially invited to participate.<br>N: 23 intervention, 24 control<br>Mean age in years (SD): 55.16 (6.87) intervention, 58.72 (7.25) control<br>Gender: 23 females intervention, 24 females control<br>Mean BMI (SD): 36.57 (5.95) intervention, 36.10 (4.37) control<br>Location: Poland                                                                                                                                                                                                                                                                           |
| Interventions | Type: supplement (sachet)<br>Comparison: probiotic supplementation vs. control<br>Intervention: received Ecologic® Barrier HD $1 \times 10^{10}$ CFU per day divided in two equal doses.<br>Control: The placebo group received the same sachets containing only the excipients, i.e., maize starch and maltodextrins.<br>Compliance: The participants were asked to return every 4 weeks to hand back the unused sachets and be given fresh refills. Besides, they were also asked not to alter their routine physical activity and usual diets and to report any side effects.<br>Length of intervention: 12 weeks |
| Outcomes      | Main study outcome: the changes in lipopolysaccharides(LPS) level and cardiometabolic parameters<br>Dropouts: 4 intervention, 3 control<br>Available outcomes: changes(the difference between the final value and the baseline) of TC, LDL, HDL and TG levels.                                                                                                                                                                                                                                                                                                                                                       |
| Notes         | The study has three intervention arms (original probiotic, low probiotic and placebo). We only used the original probiotic group as the intervention.                                                                                                                                                                                                                                                                                                                                                                                                                                                                |

***Risk of bias***

| Bias                                                                      | Authors' judgment | Support for judgment                                                                                          |
|---------------------------------------------------------------------------|-------------------|---------------------------------------------------------------------------------------------------------------|
| Random sequence generation<br>(selection bias)                            | Low risk          | Randomized, placebo-controlled clinical trial                                                                 |
| Allocation concealment<br>(selection bias)                                | Low risk          | The randomization scheme was computer-generated by Winclove using permuted blocks with block size equal to 4. |
| Blinding of participants and personnel (performance bias)<br>All outcomes | Low risk          | Double-blind                                                                                                  |
| Blinding of outcome                                                       | Low risk          | The subjects' randomization                                                                                   |

|                                                             |          |                                                                                                                                                                                                                                            |
|-------------------------------------------------------------|----------|--------------------------------------------------------------------------------------------------------------------------------------------------------------------------------------------------------------------------------------------|
| assessment (detection bias)<br>All outcomes                 |          | codes were concealed until the statistical analysis.                                                                                                                                                                                       |
| Incomplete outcome data<br>(attrition bias)<br>All outcomes | Low risk | Participant flow well described.                                                                                                                                                                                                           |
| Selective reporting (reporting bias)                        | Low risk | Trial registry code:<br>NCT03100162                                                                                                                                                                                                        |
| Attention                                                   | Low risk | All participants appear to have had similar frequency and quantity of attention and follow-up.                                                                                                                                             |
| Compliance                                                  | Low risk | The participants were asked to return every 4 weeks to hand back the unused sachets and be given fresh refills. Besides, they were also asked not to alter their routine physical activity and usual diets and to report any side effects. |
| Other bias                                                  | Low risk | No commercial company involved, and no conflict of interest.                                                                                                                                                                               |



**Madjd et al. 2016**

|               |                                                                                                                                                                                                                                                                                                                                                                                                                                                                                       |
|---------------|---------------------------------------------------------------------------------------------------------------------------------------------------------------------------------------------------------------------------------------------------------------------------------------------------------------------------------------------------------------------------------------------------------------------------------------------------------------------------------------|
| Methods       | RCT, (probiotic yogurt(PY) vs. low-fat yogurt(LF))<br>12 weeks<br>Summary risk of bias: moderate                                                                                                                                                                                                                                                                                                                                                                                      |
| Participants  | 109 healthy overweight and obese subjects<br>N: 44 intervention, 45 control<br>Mean age in years (SD): 32.20 (6.94) intervention, 31.78 (6.81) control<br>Gender: 44 females intervention, 45 females control<br>Mean BMI (SD): 32.14 (3.20) intervention, 32.05 (3.94) control<br>Location: United Kingdom                                                                                                                                                                           |
| Interventions | Type: supplement (yogurt)<br>Comparison: probiotic supplementation vs. control<br>Intervention: PY was to be consumed with the main meals (200 g twice/d) daily.<br>Control: LF was to be consumed with the main meals (200 g twice/d) daily.<br>Compliance: Compliance was monitored once a week by telephone interviews and double-checked by using a 3-d dietary food recall questionnaire that was completed 3 times during the study period.<br>Length of intervention: 12 weeks |
| Outcomes      | Main study outcome: the changes in body weight, abdominal adiposity, carbohydrate and lipid metabolism<br>Dropouts: 20<br>Available outcomes: the final value and the baseline of TC, LDL, HDL and TG levels.                                                                                                                                                                                                                                                                         |
| Notes         | The study was approved by the Ethical Committee of the Digestive Research Institute, Tehran University of Medical Science.                                                                                                                                                                                                                                                                                                                                                            |

***Risk of bias***

| <b>Bias</b>                                                               | <b>Authors' judgment</b> | <b>Support for judgment</b>                                    |
|---------------------------------------------------------------------------|--------------------------|----------------------------------------------------------------|
| Random sequence generation<br>(selection bias)                            | Low risk                 | Randomized, controlled trial                                   |
| Allocation concealment<br>(selection bias)                                | Low risk                 | A computer-generated random-numbers method was used.           |
| Blinding of participants and personnel (performance bias)<br>All outcomes | Low risk                 | Randomization was revealed to the participants and dietitians. |
| Blinding of outcome assessment (detection bias)<br>All outcomes           | High risk                | Obviously not used.                                            |
| Incomplete outcome data                                                   | Low risk                 | Participant flow well described.                               |

|                                      |          |                                                                                                                                                                                      |
|--------------------------------------|----------|--------------------------------------------------------------------------------------------------------------------------------------------------------------------------------------|
| (attrition bias)                     |          |                                                                                                                                                                                      |
| All outcomes                         |          |                                                                                                                                                                                      |
| Selective reporting (reporting bias) | Low risk | Trial registry code: IRCT201402177754N8.                                                                                                                                             |
| Attention                            | Low risk | All participants appear to have had similar frequency and quantity of attention and follow-up.                                                                                       |
| Compliance                           | Low risk | Compliance was monitored once a week by telephone interviews and double-checked by using a 3-d dietary food recall questionnaire that was completed 3 times during the study period. |
| Other bias                           | Low risk | No commercial company involved, and no conflict of interest.                                                                                                                         |

**Sanchez et al. 2013**

|               |                                                                                                                                                                                                                                                                                                                                                                                                                                                                                                                                                                                          |
|---------------|------------------------------------------------------------------------------------------------------------------------------------------------------------------------------------------------------------------------------------------------------------------------------------------------------------------------------------------------------------------------------------------------------------------------------------------------------------------------------------------------------------------------------------------------------------------------------------------|
| Methods       | RCT,( <i>Lactobacillus rhamnosus</i> CGMCC1.3724 (LPR) vs. placebo)<br>24 weeks<br>Summary risk of bias: low                                                                                                                                                                                                                                                                                                                                                                                                                                                                             |
| Participants  | This study including subjects aged between 18 to 55 years old with a BMI between 29 and 41 kg/m <sup>2</sup> .<br>N: 45 intervention, 48 control<br>Mean age in years (SD): 35.00 (10.00) intervention, 37.00 (10.00) control<br>Gender: 24 males / 38 females intervention, 24 males / 39 females control<br>Mean BMI (SD): 33.80 (3.30) intervention, 33.30 (3.20) control<br>Location: Canada                                                                                                                                                                                         |
| Interventions | Type: supplement (capsules)<br>Comparison: probiotic supplementation vs. control<br>Intervention: The subjects consumed two capsules which contained a formulation consisting of 10 mg of a LPR powder providing 1.62*10 <sup>8</sup> cfu each.<br>Control: The placebo capsules were of the same colour and size as the LPR capsules.<br>Compliance: A standardised 3d dietary record was obtained from each participant. In addition, the participants completed a 24 h dietary recall with the assistance of the dietitian every weeks and month.<br>Length of intervention: 24 weeks |
| Outcomes      | Main study outcome: the changes in body weight, body composition, physiological parameters, metabolic, inflammatory plasma markers, microbiota and so on.<br>Dropouts: 32<br>Available outcomes: changes(the difference between the final value and the baseline) of TC, LDL, HDL and TG levels.                                                                                                                                                                                                                                                                                         |
| Notes         | The present study was sponsored by The Nestle' Research Center (Lausanne, Switzerland).                                                                                                                                                                                                                                                                                                                                                                                                                                                                                                  |

***Risk of bias***

| Bias                                                                      | Authors' judgment | Support for judgment                            |
|---------------------------------------------------------------------------|-------------------|-------------------------------------------------|
| Random sequence generation<br>(selection bias)                            | Low risk          | Randomized, placebo-controlled trial            |
| Allocation concealment<br>(selection bias)                                | Low risk          | The computerized randomization system was used. |
| Blinding of participants and personnel (performance bias)<br>All outcomes | Low risk          | Double-blind                                    |
| Blinding of outcome                                                       | Low risk          | The grouping of study kept                      |

|                                                             |              |                                                                                                                                                                                                |
|-------------------------------------------------------------|--------------|------------------------------------------------------------------------------------------------------------------------------------------------------------------------------------------------|
| assessment (detection bias)<br>All outcomes                 |              | unavailable until data analysis was completed.                                                                                                                                                 |
| Incomplete outcome data<br>(attrition bias)<br>All outcomes | Low risk     | Participant flow well described.                                                                                                                                                               |
| Selective reporting (reporting bias)                        | Low risk     | Trial registry code:<br>NCT01106924                                                                                                                                                            |
| Attention                                                   | Low risk     | All participants appear to have had similar frequency and quantity of attention and follow-up.                                                                                                 |
| Compliance                                                  | Low risk     | A standardised 3d dietary record was obtained from each participant. In addition, the participants completed a 24 h dietary recall with the assistance of the dietitian every weeks and month. |
| Other bias                                                  | Unclear risk | Personnel from funding agencies participated in the study.                                                                                                                                     |

**Ivey et al. 2015**

|               |                                                                                                                                                                                                                                                                                                                                                                                                                                                                                                                                                                                                                                                                                                                    |
|---------------|--------------------------------------------------------------------------------------------------------------------------------------------------------------------------------------------------------------------------------------------------------------------------------------------------------------------------------------------------------------------------------------------------------------------------------------------------------------------------------------------------------------------------------------------------------------------------------------------------------------------------------------------------------------------------------------------------------------------|
| Methods       | <p>RCT, (probiotic yoghurt plus probiotic capsules, probiotic yoghurt plus placebo capsules, control milk plus probiotic capsules and control milk plus placebo capsules).</p> <p>6 weeks</p> <p>Summary risk of bias: low</p>                                                                                                                                                                                                                                                                                                                                                                                                                                                                                     |
| Participants  | <p>This study including 156 subjects overweight men and women over 55 years.</p> <p>N: 39 intervention, 40 control</p> <p>Mean age in years (SD): 65.00 (7.00) intervention, 65.00 (8.00) control</p> <p>Gender: 23 males / 16 females intervention, 23 males / 17females control</p> <p>Mean BMI (SD): 31.00 (4.00) intervention, 31.00 (4.00) control</p> <p>Location: Australia</p>                                                                                                                                                                                                                                                                                                                             |
| Interventions | <p>Type: supplement (capsules or yogurt)</p> <p>Comparison: probiotic supplementation vs. control</p> <p>Intervention: Capsules contained a minimum <i>L. acidophilus</i> La5 and <i>B. animalis subsp. lactis</i> Bb12 dose of <math>3.0 \times 10^9</math> CFU were consumed once daily for 6 weeks, 30 min prior to the first meal of the day.</p> <p>Control: The placebo capsules were of the same colour and size as the intervention capsules.</p> <p>Compliance: Participants were asked to refrain from consumption of all foods and products containing probiotic bacteria from three weeks prior to their baseline visit, and for the duration of the study.</p> <p>Length of intervention: 6 weeks</p> |
| Outcomes      | <p>Main study outcome: blood pressure and serum lipid profile</p> <p>Dropouts: no</p> <p>Available outcomes: the final value and the baseline of TC, LDL, HDL and TG levels.</p>                                                                                                                                                                                                                                                                                                                                                                                                                                                                                                                                   |
| Notes         | <p>The study has four intervention arms (probiotic yoghurt plus probiotic capsules, probiotic yoghurt plus placebo capsules, control milk plus probiotic capsules and control milk plus placebo capsules). We only used the control milk plus probiotic capsules as the intervention.</p>                                                                                                                                                                                                                                                                                                                                                                                                                          |

**Risk of bias**

| Bias                                           | Authors' judgment | Support for judgment                            |
|------------------------------------------------|-------------------|-------------------------------------------------|
| Random sequence generation<br>(selection bias) | Low risk          | Randomized, controlled trial                    |
| Allocation concealment<br>(selection bias)     | Low risk          | The computer-generated random numbers was used. |
| Blinding of participants and                   | Low risk          | Double-blind                                    |

|                                                 |              |                                                                                                                                                                                                |
|-------------------------------------------------|--------------|------------------------------------------------------------------------------------------------------------------------------------------------------------------------------------------------|
| personnel (performance bias)                    |              |                                                                                                                                                                                                |
| All outcomes                                    |              |                                                                                                                                                                                                |
| Blinding of outcome assessment (detection bias) | Unclear risk | Not described.                                                                                                                                                                                 |
| All outcomes                                    |              |                                                                                                                                                                                                |
| Incomplete outcome data (attrition bias)        | Low risk     | There were no dropout.                                                                                                                                                                         |
| All outcomes                                    |              |                                                                                                                                                                                                |
| Selective reporting (reporting bias)            | Low risk     | Trial registry code: ACTRN12612000033842                                                                                                                                                       |
| Attention                                       | Low risk     | No problem with attention bias.                                                                                                                                                                |
| Compliance                                      | Low risk     | Participants were asked to refrain from consumption of all foods and products containing probiotic bacteria from three weeks prior to their baseline visit, and for the duration of the study. |
| Other bias                                      | Low risk     | No commercial company involved, and no conflict of interest.                                                                                                                                   |

**Agerholm-Larsen et al et al. 2000**

| Methods                                                                   | RCT, (a yoghurt fermented with two strains of <i>Streptococcus thermophilus</i> and two strains of <i>Lactobacillus acidophilus</i> ( <i>StLa</i> ), a placebo yoghurt fermented with delta-acid-lactone (PY), a yoghurt fermented with two strains of <i>Streptococcus thermophilus</i> and one strain of <i>Lactobacillus rhamnosus</i> ( <i>StLr</i> )).<br>8 weeks<br>Summary risk of bias: low                                                                                                                                                                                                                                                   |                                                                                   |                   |                      |                                                |          |                                         |                                            |          |                                                                                   |                                                                           |          |              |                                                 |              |                |
|---------------------------------------------------------------------------|-------------------------------------------------------------------------------------------------------------------------------------------------------------------------------------------------------------------------------------------------------------------------------------------------------------------------------------------------------------------------------------------------------------------------------------------------------------------------------------------------------------------------------------------------------------------------------------------------------------------------------------------------------|-----------------------------------------------------------------------------------|-------------------|----------------------|------------------------------------------------|----------|-----------------------------------------|--------------------------------------------|----------|-----------------------------------------------------------------------------------|---------------------------------------------------------------------------|----------|--------------|-------------------------------------------------|--------------|----------------|
| Participants                                                              | Seventy healthy, weight-stable, overweight and obese ( $25.0 < \text{BMI} < 37.5 \text{ kg/m}^2$ ) males (n=20) and females (n=50), 18-55 years old.<br>N: 16 intervention(1), 14 intervention(2), 14 control<br>Mean age in years (SD): 38.60 (2.10) intervention(1), 37.90 (2.40) intervention(2), 39.40 (2.10) control<br>Gender: 12 males / 4 females intervention(1), 10 males / 4 females intervention(2), 9 males / 5females control<br>Mean BMI (SD): 30.00 (0.70) intervention(1), 30.20 (0.70) intervention(2), 30.00 (0.90) control<br>Location: Denmark                                                                                   |                                                                                   |                   |                      |                                                |          |                                         |                                            |          |                                                                                   |                                                                           |          |              |                                                 |              |                |
| Interventions                                                             | Type: supplement (yogurt)<br>Comparison: probiotic supplementation vs. control<br>Intervention(1): <i>StLa</i> for 8 weeks<br>Intervention(2): <i>StLa</i> for 8 weeks<br>Control: PY for 8 weeks<br>Compliance: the compliance of the study was controlled in dietary and measuring with many methods comprehensively.<br>Length of intervention: 8 weeks                                                                                                                                                                                                                                                                                            |                                                                                   |                   |                      |                                                |          |                                         |                                            |          |                                                                                   |                                                                           |          |              |                                                 |              |                |
| Outcomes                                                                  | Main study outcome: cardiovascular disease risk factors<br>Dropouts: no<br>Available outcomes: changes(the difference between the final value and the baseline) of TC, LDL, HDL and TG levels.                                                                                                                                                                                                                                                                                                                                                                                                                                                        |                                                                                   |                   |                      |                                                |          |                                         |                                            |          |                                                                                   |                                                                           |          |              |                                                 |              |                |
| Notes                                                                     | Sponsorship: MD Foods A/S, Denmark.                                                                                                                                                                                                                                                                                                                                                                                                                                                                                                                                                                                                                   |                                                                                   |                   |                      |                                                |          |                                         |                                            |          |                                                                                   |                                                                           |          |              |                                                 |              |                |
| <b>Risk of bias</b>                                                       |                                                                                                                                                                                                                                                                                                                                                                                                                                                                                                                                                                                                                                                       |                                                                                   |                   |                      |                                                |          |                                         |                                            |          |                                                                                   |                                                                           |          |              |                                                 |              |                |
|                                                                           | <table><tr><th>Bias</th><th>Authors' judgment</th><th>Support for judgment</th></tr><tr><td>Random sequence generation<br/>(selection bias)</td><td>Low risk</td><td>Randomized, compliance-controlled trial</td></tr><tr><td>Allocation concealment<br/>(selection bias)</td><td>Low risk</td><td>The matching was performed blinded by a person with no contact with the subjects.</td></tr><tr><td>Blinding of participants and personnel (performance bias)<br/>All outcomes</td><td>Low risk</td><td>Double-blind</td></tr><tr><td>Blinding of outcome assessment (detection bias)</td><td>Unclear risk</td><td>Not described.</td></tr></table> | Bias                                                                              | Authors' judgment | Support for judgment | Random sequence generation<br>(selection bias) | Low risk | Randomized, compliance-controlled trial | Allocation concealment<br>(selection bias) | Low risk | The matching was performed blinded by a person with no contact with the subjects. | Blinding of participants and personnel (performance bias)<br>All outcomes | Low risk | Double-blind | Blinding of outcome assessment (detection bias) | Unclear risk | Not described. |
| Bias                                                                      | Authors' judgment                                                                                                                                                                                                                                                                                                                                                                                                                                                                                                                                                                                                                                     | Support for judgment                                                              |                   |                      |                                                |          |                                         |                                            |          |                                                                                   |                                                                           |          |              |                                                 |              |                |
| Random sequence generation<br>(selection bias)                            | Low risk                                                                                                                                                                                                                                                                                                                                                                                                                                                                                                                                                                                                                                              | Randomized, compliance-controlled trial                                           |                   |                      |                                                |          |                                         |                                            |          |                                                                                   |                                                                           |          |              |                                                 |              |                |
| Allocation concealment<br>(selection bias)                                | Low risk                                                                                                                                                                                                                                                                                                                                                                                                                                                                                                                                                                                                                                              | The matching was performed blinded by a person with no contact with the subjects. |                   |                      |                                                |          |                                         |                                            |          |                                                                                   |                                                                           |          |              |                                                 |              |                |
| Blinding of participants and personnel (performance bias)<br>All outcomes | Low risk                                                                                                                                                                                                                                                                                                                                                                                                                                                                                                                                                                                                                                              | Double-blind                                                                      |                   |                      |                                                |          |                                         |                                            |          |                                                                                   |                                                                           |          |              |                                                 |              |                |
| Blinding of outcome assessment (detection bias)                           | Unclear risk                                                                                                                                                                                                                                                                                                                                                                                                                                                                                                                                                                                                                                          | Not described.                                                                    |                   |                      |                                                |          |                                         |                                            |          |                                                                                   |                                                                           |          |              |                                                 |              |                |

|                                             |              |                                                                                                                 |
|---------------------------------------------|--------------|-----------------------------------------------------------------------------------------------------------------|
| All outcomes                                |              |                                                                                                                 |
| Incomplete outcome data<br>(attrition bias) | Low risk     | There were no dropout.                                                                                          |
| All outcomes                                |              |                                                                                                                 |
| Selective reporting (reporting<br>bias)     | Unclear risk | Although the design accorded to<br>RCT specifications, the clinical<br>registration number was lacked.          |
| Attention                                   | Low risk     | No problem with attention bias.                                                                                 |
| Compliance                                  | Low risk     | The compliance of the study was<br>controlled in dietary and<br>measuring with many methods<br>comprehensively. |
| Other bias                                  | Low risk     | No commercial company<br>involved, and no conflict of<br>interest.                                              |
